# Supplementary material for: Ultra-processed food consumption is associated with increase in fat mass and decrease in lean mass in Brazilian women: A cohort study
Source: PubMed Central journal article supplement (PMC9615037; doi:10.3389/fnut.2022.1006018), 2022-10-14
Supplement: Data_Sheet_1.pdf [file Data_Sheet_1.pdf]

*Supplementary Material*

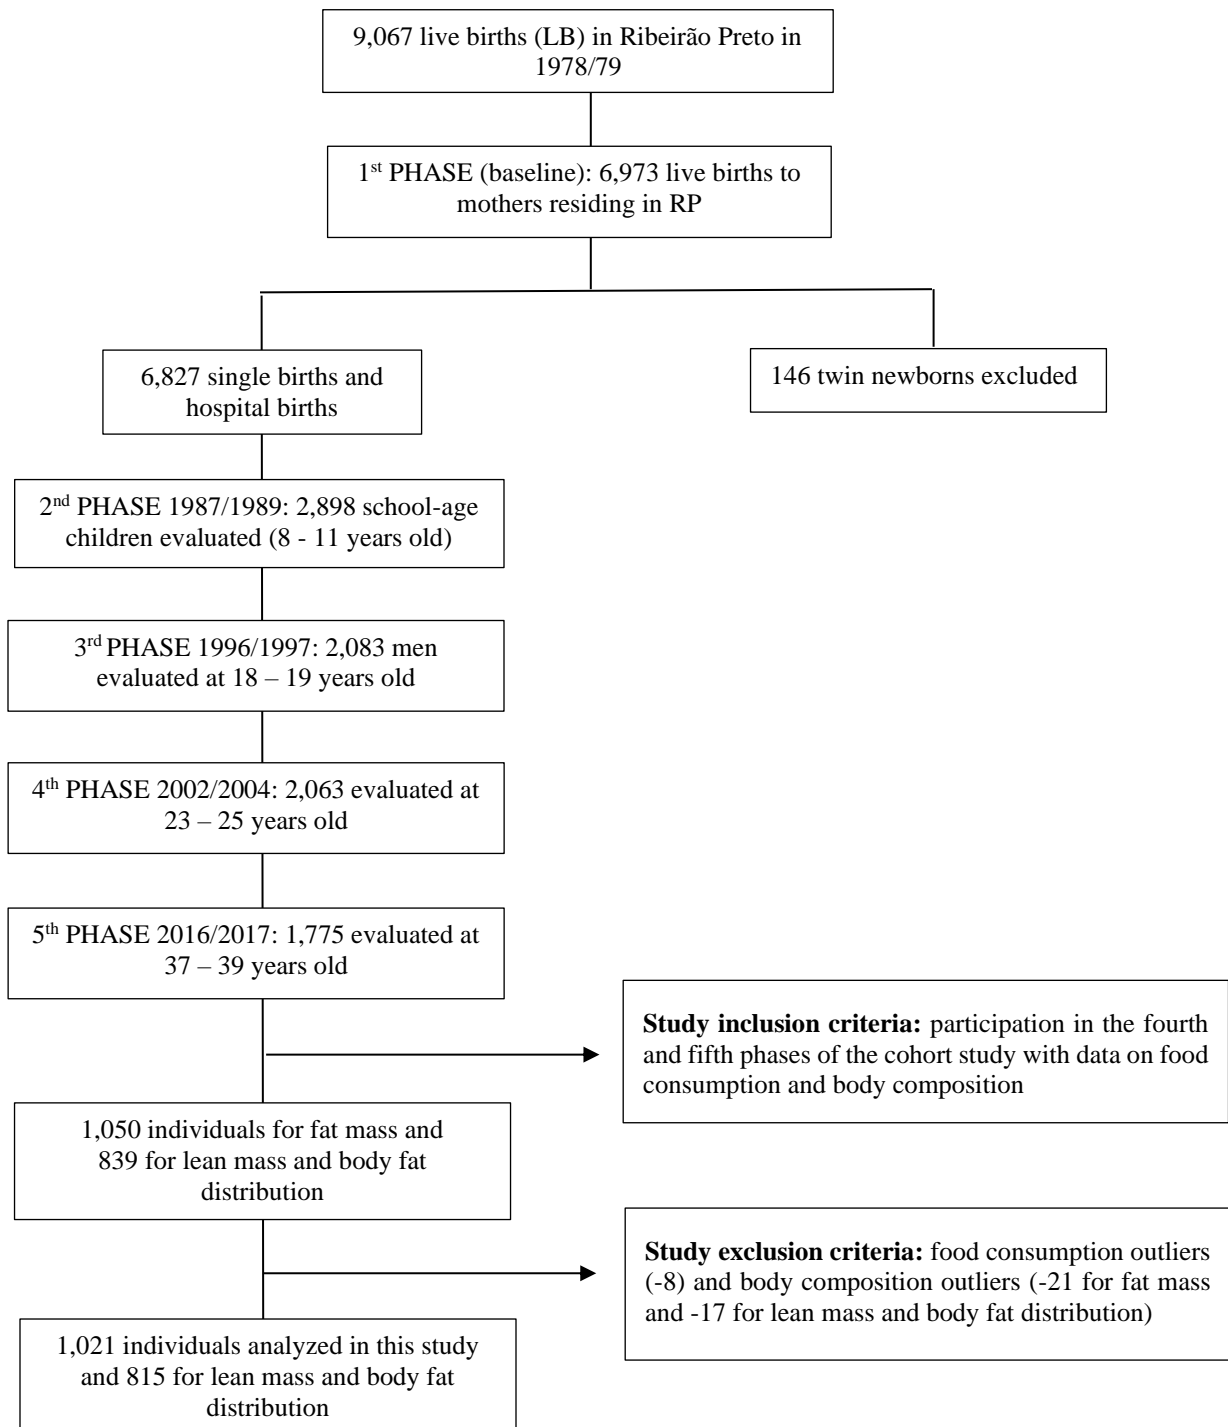

**Figure S1.** Flowchart of birth cohort study participants from Ribeirão Preto, São Paulo, Brazil (1978/79-2016/17)

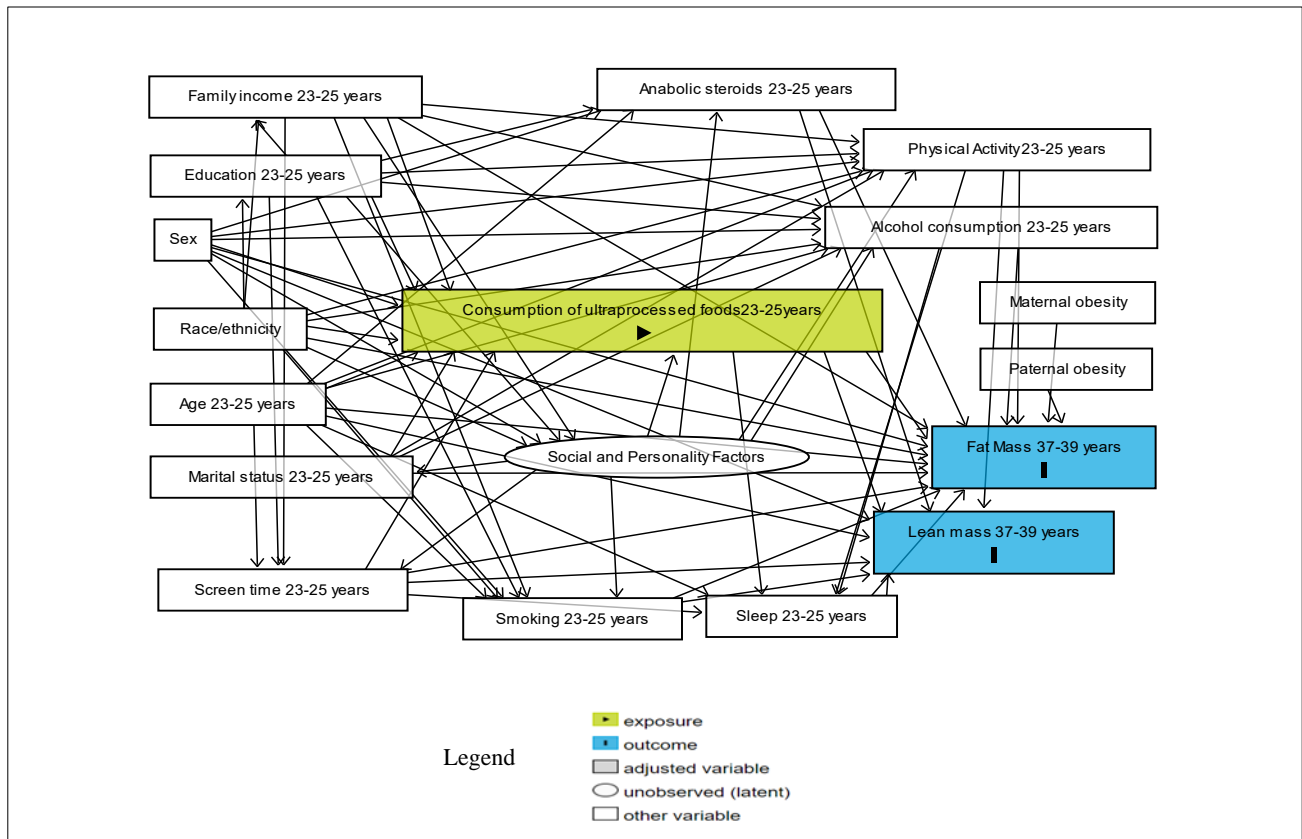

**Figure S2.** Directed acyclic graphs of the effect of ultra-processed foods consumption at 23-25 years on body adiposity, and lean mass of adults at 37-39 years

**Table S1.** Gram contribution percentage of food preparations, processed and ultra-processed foods to the total dietary energy intake by adults aged 23-25 years (2002/2004) participating in the 1978/1979 Ribeirão Preto birth cohort study (São Paulo, Brazil)

| Good groups<br>Food items              | Consumption mean in % grams |                       |                |                       |                  |                       | p-value <sup>a</sup> |
|----------------------------------------|-----------------------------|-----------------------|----------------|-----------------------|------------------|-----------------------|----------------------|
|                                        | All<br>(n=1,021)            | Standard<br>deviation | Men<br>(n=481) | Standard<br>deviation | Women<br>(n=540) | Standard<br>deviation |                      |
| <b>ULTRA-PROCESSED FOODS</b>           |                             |                       |                |                       |                  |                       |                      |
| Sugar-sweetened beverages <sup>b</sup> | 24.64                       | 15.20                 | 24.45          | 14.06                 | 24.82            | 16.16                 | 0.697                |
| Savory snacks                          | 3.57                        | 3.29                  | 4.07           | 3.47                  | 3.04             | 2.93                  | < 0.001              |
| Dairy products                         | 1.45                        | 1.98                  | 1.09           | 1.48                  | 1.76             | 2.30                  | < 0.001              |
| Candies                                | 1.34                        | 1.27                  | 1.16           | 1.18                  | 1.49             | 1.34                  | < 0.001              |
| Cold meats                             | 1.11                        | 0.94                  | 1.20           | 0.95                  | 1.03             | 0.93                  | 0.005                |
| Cake                                   | 0.87                        | 1.36                  | 0.70           | 0.90                  | 1.02             | 1.65                  | < 0.001              |
| Ultra-processed bread                  | 0.80                        | 0.71                  | 0.72           | 0.64                  | 0.85             | 0.77                  | 0.005                |
| Crackers                               | 0.74                        | 0.89                  | 0.58           | 0.68                  | 0.87             | 1.03                  | < 0.001              |
| Instant noodles                        | 0.43                        | 0.35                  | 0.43           | 0.35                  | 0.44             | 0.35                  | 0.567                |
| Snacks                                 | 0.38                        | 0.73                  | 0.32           | 0.79                  | 0.43             | 0.67                  | 0.018                |
| Mayonnaise                             | 0.18                        | 0.28                  | 0.20           | 0.27                  | 0.16             | 0.29                  | 0.029                |
| Granola                                | 0.16                        | 0.39                  | 0.13           | 0.34                  | 0.18             | 0.43                  | 0.050                |
| Margarine                              | 0.15                        | 0.19                  | 0.13           | 0.14                  | 0.17             | 0.22                  | < 0.001              |
| Distilled drinks                       | 0.06                        | 0.17                  | 0.08           | 0.21                  | 0.04             | 0.12                  | < 0.001              |
| <b>PROCESSED FOODS</b>                 |                             |                       |                |                       |                  |                       |                      |
| Fermented drinks                       | 3.83                        | 5.37                  | 5.45           | 5.89                  | 2.40             | 4.39                  | < 0.001              |
| Bread                                  | 2.40                        | 1.70                  | 2.49           | 1.65                  | 2.31             | 1.75                  | 0.099                |
| Cheese                                 | 0.68                        | 0.69                  | 0.67           | 0.69                  | 0.70             | 0.68                  | 0.435                |
| Salty-cured meats                      | 0.12                        | 0.23                  | 0.16           | 0.26                  | 0.09             | 0.18                  | < 0.001              |
| Fruit dessert                          | 0.09                        | 0.26                  | 0.08           | 0.29                  | 0.09             | 0.23                  | 0.489                |
| Jam                                    | 0.01                        | 0.04                  | 0.01           | 0.04                  | 0.01             | 0.04                  | 0.770                |
| <b>FOOD PREPARATIONS</b>               |                             |                       |                |                       |                  |                       |                      |
| Fruit and fruit juices                 | 14.19                       | 9.34                  | 12.79          | 8.73                  | 15.44            | 9.68                  | < 0.001              |
| Rice                                   | 8.43                        | 4.72                  | 8.90           | 4.76                  | 8.03             | 4.65                  | 0.004                |
| Milk and yogurt                        | 7.11                        | 7.13                  | 7.10           | 6.85                  | 7.12             | 7.38                  | 0.986                |
| Legumes                                | 6.36                        | 4.52                  | 7.14           | 4.27                  | 5.67             | 4.63                  | < 0.001              |
| Vegetables                             | 5.78                        | 4.23                  | 4.63           | 3.57                  | 6.79             | 4.50                  | < 0.001              |
| Coffee/tea                             | 4.93                        | 6.12                  | 4.84           | 6.38                  | 5.01             | 5.88                  | 0.661                |
| Red meat                               | 3.86                        | 2.44                  | 4.08           | 2.32                  | 3.66             | 2.53                  | 0.006                |
| Potato, cassava and corn               | 1.90                        | 1.43                  | 1.77           | 1.31                  | 2.00             | 1.53                  | 0.011                |
| Chicken/poultry                        | 1.67                        | 1.43                  | 1.62           | 1.45                  | 1.72             | 1.42                  | 0.238                |
| Pasta                                  | 1.17                        | 0.91                  | 1.22           | 0.94                  | 1.13             | 0.88                  | 0.111                |
| Eggs                                   | 0.61                        | 0.70                  | 0.72           | 0.77                  | 0.52             | 0.61                  | < 0.001              |
| Fish                                   | 0.56                        | 0.81                  | 0.55           | 0.82                  | 0.57             | 0.80                  | 0.631                |
| Popcorn                                | 0.19                        | 0.36                  | 0.16           | 0.39                  | 0.21             | 0.33                  | 0.018                |
| Chestnuts and oilseeds                 | 0.12                        | 0.40                  | 0.18           | 0.49                  | 0.08             | 0.29                  | < 0.001              |
| Offal                                  | 0.10                        | 0.27                  | 0.12           | 0.30                  | 0.09             | 0.24                  | 0.114                |
| Butter                                 | 0.04                        | 0.10                  | 0.04           | 0.09                  | 0.04             | 0.12                  | 0.625                |
| Oatmeal                                | 0.02                        | 0.05                  | 0.02           | 0.04                  | 0.03             | 0.05                  | 0.050                |
| Honey                                  | 0.02                        | 0.08                  | 0.02           | 0.07                  | 0.02             | 0.08                  | 0.770                |

<sup>a</sup>Student's t-test<sup>b</sup>Soft drinks and industrialized juices

**Table S2.** Percentage contribution of food preparations, processed, processed and ultra-processed foods to the total dietary energy intake by adults aged 23-25 years (2002/-2004) participating in the 1978/1979 Ribeirão Preto birth cohort study (São Paulo, Brazil)

| Food groups<br>Food items              | Mean percentage of % caloric contribution |                       |             |                       |                  |                       | p-value <sup>a</sup> |
|----------------------------------------|-------------------------------------------|-----------------------|-------------|-----------------------|------------------|-----------------------|----------------------|
|                                        | All<br>(n=1,021)                          | Standard<br>deviation | Men (n=481) | Standard<br>deviation | Women<br>(n=540) | Standard<br>deviation |                      |
| <b>ULTRA-PROCESSED FOODS</b>           |                                           |                       |             |                       |                  |                       |                      |
| Sugar-sweetened beverages <sup>b</sup> | 10.24                                     | 7.98                  | 9.69        | 6.91                  | 10.73            | 8.81                  | 0.038                |
| Snacks                                 | 8.16                                      | 6.89                  | 9.33        | 7.39                  | 7.11             | 6.24                  | < 0.001              |
| Candies                                | 4.29                                      | 3.96                  | 3.57        | 3.50                  | 4.94             | 4.23                  | < 0.001              |
| Crackers                               | 3.09                                      | 3.43                  | 2.47        | 2.67                  | 3.64             | 3.91                  | < 0.001              |
| Ultra-processed bread                  | 2.08                                      | 1.83                  | 1.85        | 1.51                  | 2.27             | 2.06                  | < 0.001              |
| Cake                                   | 1.96                                      | 2.80                  | 1.57        | 1.92                  | 2.30             | 3.36                  | < 0.001              |
| Cold meats                             | 1.86                                      | 1.71                  | 2.01        | 1.71                  | 1.72             | 1.71                  | 0.007                |
| Snacks                                 | 1.71                                      | 2.64                  | 1.42        | 2.48                  | 1.97             | 2.74                  | 0.001                |
| Dairy products                         | 1.63                                      | 2.15                  | 1.23        | 1.62                  | 1.98             | 2.49                  | < 0.001              |
| Instant noodles                        | 1.03                                      | 0.77                  | 0.99        | 0.77                  | 1.05             | 0.77                  | 0.281                |
| Margarine                              | 0.85                                      | 1.05                  | 0.75        | 0.88                  | 0.94             | 1.18                  | 0.005                |
| Granola                                | 0.58                                      | 1.44                  | 0.46        | 1.20                  | 0.68             | 1.63                  | 0.017                |
| Mayonnaise                             | 0.52                                      | 0.77                  | 0.58        | 0.79                  | 0.46             | 0.75                  | 0.011                |
| Distilled drinks                       | 0.14                                      | 0.43                  | 0.19        | 0.52                  | 0.09             | 0.32                  | 0.004                |
| <b>PROCESSED FOODS</b>                 |                                           |                       |             |                       |                  |                       |                      |
| Bread                                  | 6.13                                      | 4.05                  | 6.35        | 3.90                  | 5.95             | 4.18                  | 0.117                |
| Cheese                                 | 2.00                                      | 1.93                  | 1.90        | 1.95                  | 2.10             | 1.92                  | 0.316                |
| Fermented drinks                       | 1.70                                      | 2.52                  | 2.34        | 2.64                  | 1.12             | 2.26                  | < 0.001              |
| Salty-cured meats                      | 0.63                                      | 1.12                  | 0.81        | 1.27                  | 0.46             | 0.94                  | < 0.001              |
| Fruit dessert                          | 0.23                                      | 0.70                  | 0.22        | 0.78                  | 0.25             | 0.62                  | 0.514                |
| Jam                                    | 0.04                                      | 0.12                  | 0.03        | 0.12                  | 0.04             | 0.12                  | 0.584                |
| <b>FOOD PREPARATIONS</b>               |                                           |                       |             |                       |                  |                       |                      |
| Rice                                   | 9.90                                      | 5.41                  | 10.4        | 5.55                  | 9.46             | 5.25                  | 0.006                |
| Read meat                              | 8.43                                      | 5.26                  | 9.05        | 5.22                  | 7.87             | 5.25                  | < 0.001              |
| Fruit and fruit juices                 | 8.15                                      | 5.56                  | 7.31        | 5.19                  | 8.90             | 5.76                  | < 0.001              |
| Legumes                                | 4.80                                      | 3.28                  | 5.40        | 3.16                  | 4.27             | 3.30                  | < 0.001              |
| Milk and yogurt                        | 3.94                                      | 4.04                  | 4.01        | 4.00                  | 3.87             | 4.08                  | 0.586                |
| Chicken/poultry                        | 3.13                                      | 2.69                  | 2.99        | 2.67                  | 3.25             | 2.69                  | 0.130                |
| Pasta                                  | 2.96                                      | 2.16                  | 3.12        | 2.32                  | 2.82             | 1.99                  | 0.028                |
| Potato, cassava and corn               | 2.56                                      | 2.02                  | 2.46        | 1.78                  | 2.65             | 2.21                  | 0.133                |
| Coffee/tea                             | 1.67                                      | 2.75                  | 1.88        | 3.03                  | 1.49             | 2.50                  | 0.024                |
| Vegetables                             | 1.43                                      | 1.25                  | 1.12        | 1.03                  | 1.72             | 1.37                  | < 0.001              |
| Eggs                                   | 1.08                                      | 1.20                  | 1.26        | 1.29                  | 0.91             | 1.09                  | < 0.001              |
| Popcorn                                | 0.84                                      | 1.30                  | 0.70        | 1.22                  | 0.97             | 1.35                  | 0.001                |
| Fish                                   | 0.80                                      | 1.19                  | 0.76        | 1.16                  | 0.83             | 1.22                  | 0.362                |
| Chestnuts and oilseeds                 | 0.65                                      | 1.90                  | 0.92        | 2.35                  | 0.4              | 1.33                  | < 0.001              |
| Butter                                 | 0.36                                      | 1.01                  | 0.36        | 0.87                  | 0.37             | 1.11                  | 0.806                |
| Offal                                  | 0.21                                      | 0.59                  | 0.24        | 0.65                  | 0.19             | 0.53                  | 0.122                |
| Oatmeal                                | 0.08                                      | 0.20                  | 0.06        | 0.16                  | 0.09             | 0.22                  | 0.017                |
| Honey                                  | 0.07                                      | 0.23                  | 0.06        | 0.23                  | 0.07             | 0.23                  | 0.585                |

<sup>a</sup>Student's t-test<sup>b</sup>Soft drinks and industrialized juices

**Table S3.** Crude and adjusted linear regression analysis between ultra-processed food consumption (% TDEI) at 23-25 years (2002/2004) and body composition measurements at 37-39 years (2016/2017) in participants of the 1978/1979 Ribeirão Preto birth cohort study (São Paulo, Brazil)

| BODY COMPOSITION MEASUREMENTS                          | % TDEI OF ULTRA-PROCESSED FOODS |         |                                |         |
|--------------------------------------------------------|---------------------------------|---------|--------------------------------|---------|
|                                                        | Crude analysis                  |         | Adjusted analysis <sup>d</sup> |         |
|                                                        | $\beta$ (95%CI)                 | p-value | $\beta$ (95%CI)                | p-value |
| <b>Body mass index (kg/m<sup>2</sup>)</b>              |                                 |         |                                |         |
| a                                                      | 0.01 (-0.02, 0.04)              | 0.400   | 0.02 (-0.009, 0.05)            | 0.176   |
| b                                                      |                                 |         | -1.23 (-1.94, -0.51)           | 0.001   |
| c                                                      | 0.06 (-0.00, 0.12)              | 0.056   | 0.06 (0.00, 0.12)              | 0.038   |
| <b>Fat mass index (kg/m<sup>2</sup>)</b>               |                                 |         |                                |         |
| a                                                      | 0.04 (0.02, 0.06)               | 0.001   | 0.02 (-0.004, 0.05)            | 0.054   |
| b                                                      |                                 |         | 2.71 (2.17, 3.25)              | < 0.001 |
| c                                                      | 0.05 (0.00, 0.09)               | 0.033   | 0.06 (0.01, 0.10)              | 0.018   |
| <b>Body fat percentage (%)</b>                         |                                 |         |                                |         |
| a                                                      | 0.11 (0.06, 0.17)               | < 0.001 | 0.05 (0.00, 0.10)              | 0.042   |
| b                                                      |                                 |         | 10.36 (9.23, 11.49)            | < 0.001 |
| c                                                      | 0.10 (0.00, 0.20)               | 0.032   | 0.11 (0.02, 0.21)              | 0.017   |
| <b>Android fat (kg)</b>                                |                                 |         |                                |         |
| a                                                      | 0.00 (-0.007, 0.005)            | 0.757   | 0.002 (-0.005, 0.008)          | 0.645   |
| b                                                      |                                 |         | -0.33 (-0.49, -0.17)           | < 0.001 |
| c                                                      | 0.01 (0.00, 0.04)               | 0.088   | 0.01 (0.00, 0.02)              | 0.071   |
| <b>Gynoid fat (kg)</b>                                 |                                 |         |                                |         |
| a                                                      | 0.01 (0.00, 0.02)               | 0.031   | 0.00 (-0.01, 0.01)             | 0.764   |
| b                                                      |                                 |         | 1.34 (1.08, 1.60)              | < 0.001 |
| c                                                      | 0.02 (0.00, 0.04)               | 0.029   | 0.02 (0.00, 0.04)              | 0.038   |
| <b>Android/gynoid fat ratio</b>                        |                                 |         |                                |         |
| a                                                      | -0.0009 (-0.002, -0.0001)       | 0.021   | 0.00 (-0.0008, 0.0006)         | 0.843   |
| b                                                      |                                 |         | -0.17 (-0.19, -0.15)           | < 0.001 |
| c                                                      | 0.00 (-0.001, 0.001)            | 0.862   | 0.0004 (-0.001, 0.002)         | 0.556   |
| <b>Lean mass percentage (%)</b>                        |                                 |         |                                |         |
| a                                                      | -0.09 (-0.14, -0.03)            | 0.003   | -0.02 (-0.07, 0.02)            | 0.390   |
| b                                                      |                                 |         | -11.27 (-12.39, -10.16)        | < 0.001 |
| c                                                      | -0.11 (-0.19, -0.02)            | 0.018   | -0.13 (-0.23, -0.04)           | 0.004   |
| <b>Lean mass index (kg/m<sup>2</sup>)</b>              |                                 |         |                                |         |
| a                                                      | -0.02 (-0.04, -0.008)           | 0.003   | -0.003 (-0.02, 0.01)           | 0.586   |
| b                                                      |                                 |         | -3.74 (-4.01, -3.46)           | < 0.001 |
| c                                                      | 0.00 (-0.01, 0.03)              | 0.480   | 0.01 (-0.01, 0.03)             | 0.392   |
| <b>Appendicular lean mass index (kg/m<sup>2</sup>)</b> |                                 |         |                                |         |
| a                                                      | -0.01 (-0.02, -0.006)           | 0.001   | -0.003 (-0.009, 0.003)         | 0.398   |
| b                                                      |                                 |         | -2.19 (-2.32, -2.06)           | < 0.001 |
| c                                                      | 0.00 (-0.009, 0.01)             | 0.740   | 0.002 (-0.009, 0.01)           | 0.713   |

<sup>a</sup>  $\beta$  coefficient of linear regression<sup>b</sup>  $\beta$  coefficient of linear regression for women<sup>c</sup>  $\beta$  coefficient of the interaction term between consumption of ultra-processed foods and sex<sup>d</sup> Analysis adjusted for sex, age, family income, marital status, television and reading time, physical activity level, smoking, anabolic steroid use and total dietary energy intake

TDEI: Total Dietary Energy Intake

**Table S4.** Conditional effects between the consumption of ultra-processed food consumption (% TDEI) according to sex at 23-25 years (2002/2004) and body composition measurements at 37-39 years (2016/2017) in participants in the 1978/1979 Ribeirão Preto birth cohort study (São Paulo, Brazil)

| Linear Regression Prediction of Body Composition Measurements | % TDEI OF ULTRA-PROCESSED FOODS |         |                                |         |
|---------------------------------------------------------------|---------------------------------|---------|--------------------------------|---------|
|                                                               | Crude analysis                  |         | Adjusted analysis <sup>a</sup> |         |
|                                                               | $\beta$ (95%CI)                 | p-value | $\beta$ (95%CI)                | p-value |
| <b>Body mass index (kg/m<sup>2</sup>)</b>                     |                                 |         |                                |         |
| Men                                                           | -0.01 (-0.06,0.03)              | 0.593   | -0.01 (-0.06,0.03)             | 0.602   |
| Women                                                         | 0.05 (0.00,0.09)                | 0.032   | 0.05 (0.01,0.09)               | 0.016   |
| <b>Fat mass index (kg/m<sup>2</sup>)</b>                      |                                 |         |                                |         |
| Men                                                           | -0.01 (-0.04,0.03)              | 0.741   | -0.01 (-0.04,0.03)             | 0.738   |
| Women                                                         | 0.04 (0.01,0.08)                | 0.008   | 0.05 (0.02,0.08)               | 0.003   |
| <b>Body fat percentage</b>                                    |                                 |         |                                |         |
| Men                                                           | -0.01 (-0.08,0.06)              | 0.704   | -0.01 (-0.08,0.06)             | 0.790   |
| Women                                                         | 0.09 (0.02,0.16)                | 0.007   | 0.11 (0.04,0.17)               | 0.002   |
| <b>Android fat (kg)</b>                                       |                                 |         |                                |         |
| Men                                                           | 0.00 (-0.02,0.00)               | 0.267   | -0.01(-0.02,0.00)              | 0.344   |
| Women                                                         | 0.00 (0.00,0.01)                | 0.183   | 0.007 (-0.001,0.02)            | 0.097   |
| <b>Gynoid fat (kg)</b>                                        |                                 |         |                                |         |
| Men                                                           | -0.01 (-0.02,0.00)              | 0.236   | - 0.01 (-0.02,0.00)            | 0.404   |
| Women                                                         | 0.01 (0.00,0.03)                | 0.063   | 0.02 (0.00,0.03)               | 0.041   |
| <b>Lean mass percentage (%)</b>                               |                                 |         |                                |         |
| Men                                                           | 0.04 ( -0.02,0.10)              | 0.196   | 0.05 (-0.02,0.12)              | 0.164   |
| Women                                                         | -0.07 (-0.13,-0.004)            | 0.038   | -0.08 (-0.14,-0.02)            | 0.006   |

<sup>a</sup> Analysis adjusted for sex, age, family income, marital status, television and reading time, physical activity level, smoking, anabolic steroid use and total dietary energy intake

TDEI: Total Dietary Energy Intake

Margins plot of ultra-processed foods (UPF) consumption in %grams at 23-25 years (2002-2004) versus Body Mass Index (BMI) (kg/m<sup>2</sup>) at 37-39 years (2016-2017) according to sex

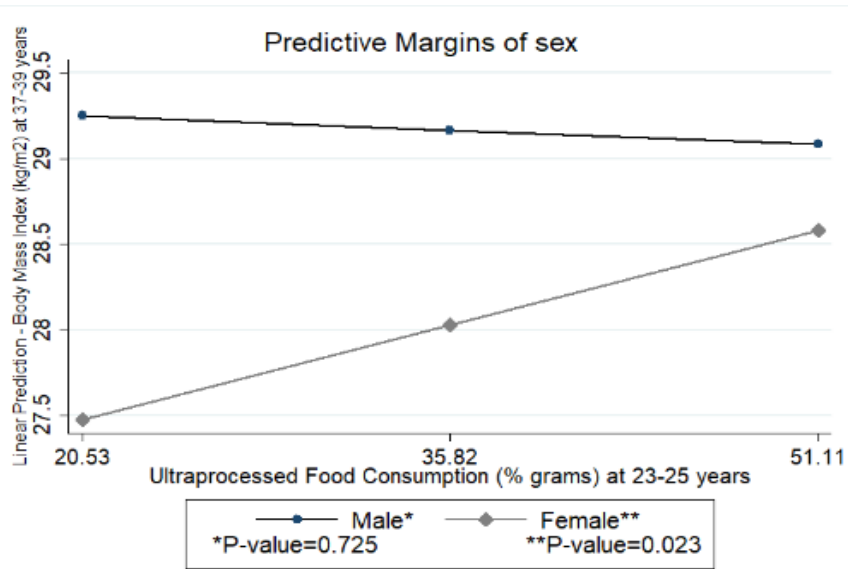

Margins plot of ultra-processed foods (UPF) consumption in %kcal at 23-25 years (2002-2004) versus Body Mass Index (BMI) (kg/m<sup>2</sup>) at 37-39 years (2016-2017) according to sex

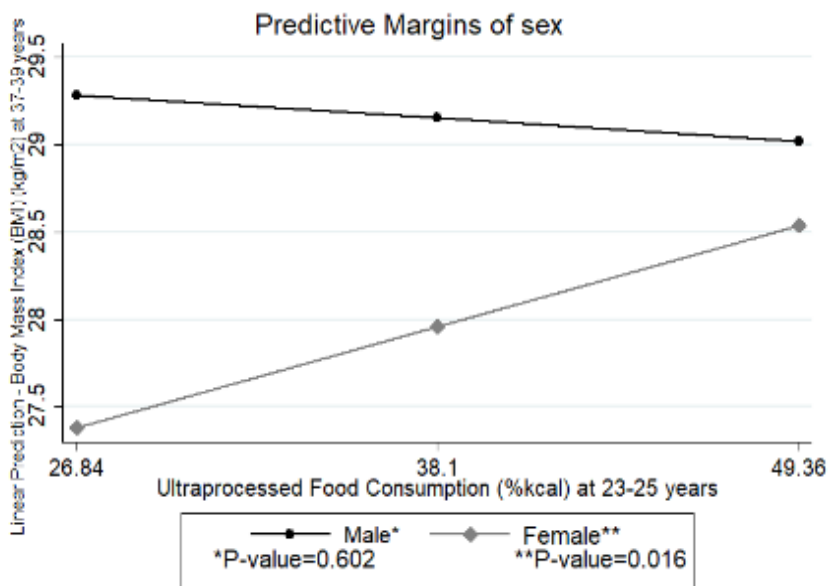

**Figure S3.** Conditional effects of ultra-processed foods (UPF) consumption at 23-25 years (2002-2004) on body composition measurements - Body Mass Index (kg/m<sup>2</sup>) at 37-39 years (2016-2017) according to sex. Ribeirão Preto Cohort 1978/79, São Paulo, Brazil (n=1,021)

Margins plot of ultra-processed foods (UPF) consumption in %grams at 23-25 years (2002-2004) versus Fat Mass Index ( $\text{kg}/\text{m}^2$ ) at 37-39 years (2016-2017) according to sex

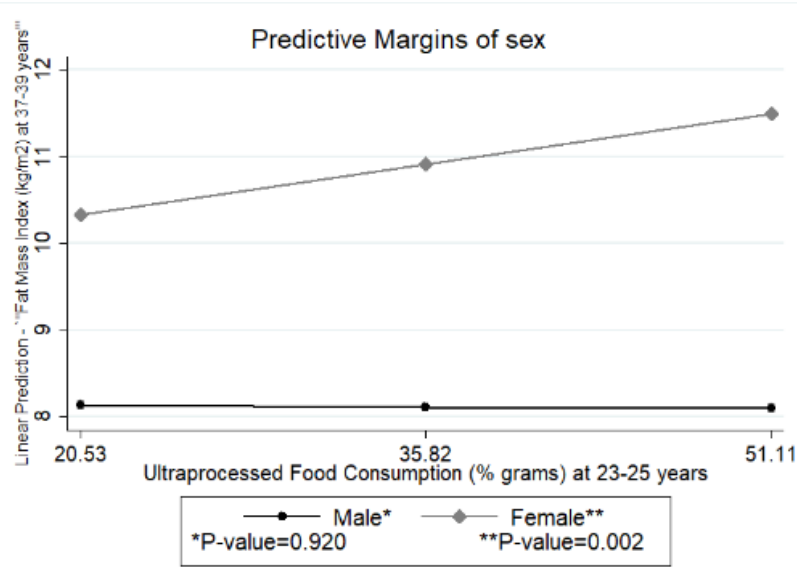

Margins plot of ultra-processed foods (UPF) consumption in %kcal at 23-25 years (2002-2004) versus Fat Mass Index ( $\text{kg}/\text{m}^2$ ) at 37-39 years (2016-2017) according to sex

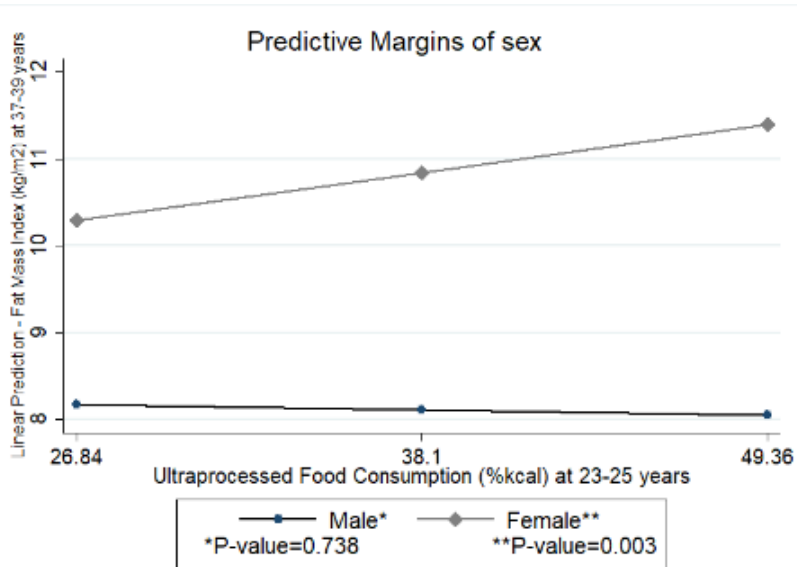

**Figure S4.** Conditional effects of ultra-processed foods (UPF) consumption at 23-25 years (2002-2004) on body composition measurements - Fat Mass Index ( $\text{kg}/\text{m}^2$ ) at 37-39 years (2016-2017) according to sex. Ribeirão Preto Cohort 1978/79, São Paulo, Brazil (n=1,021)



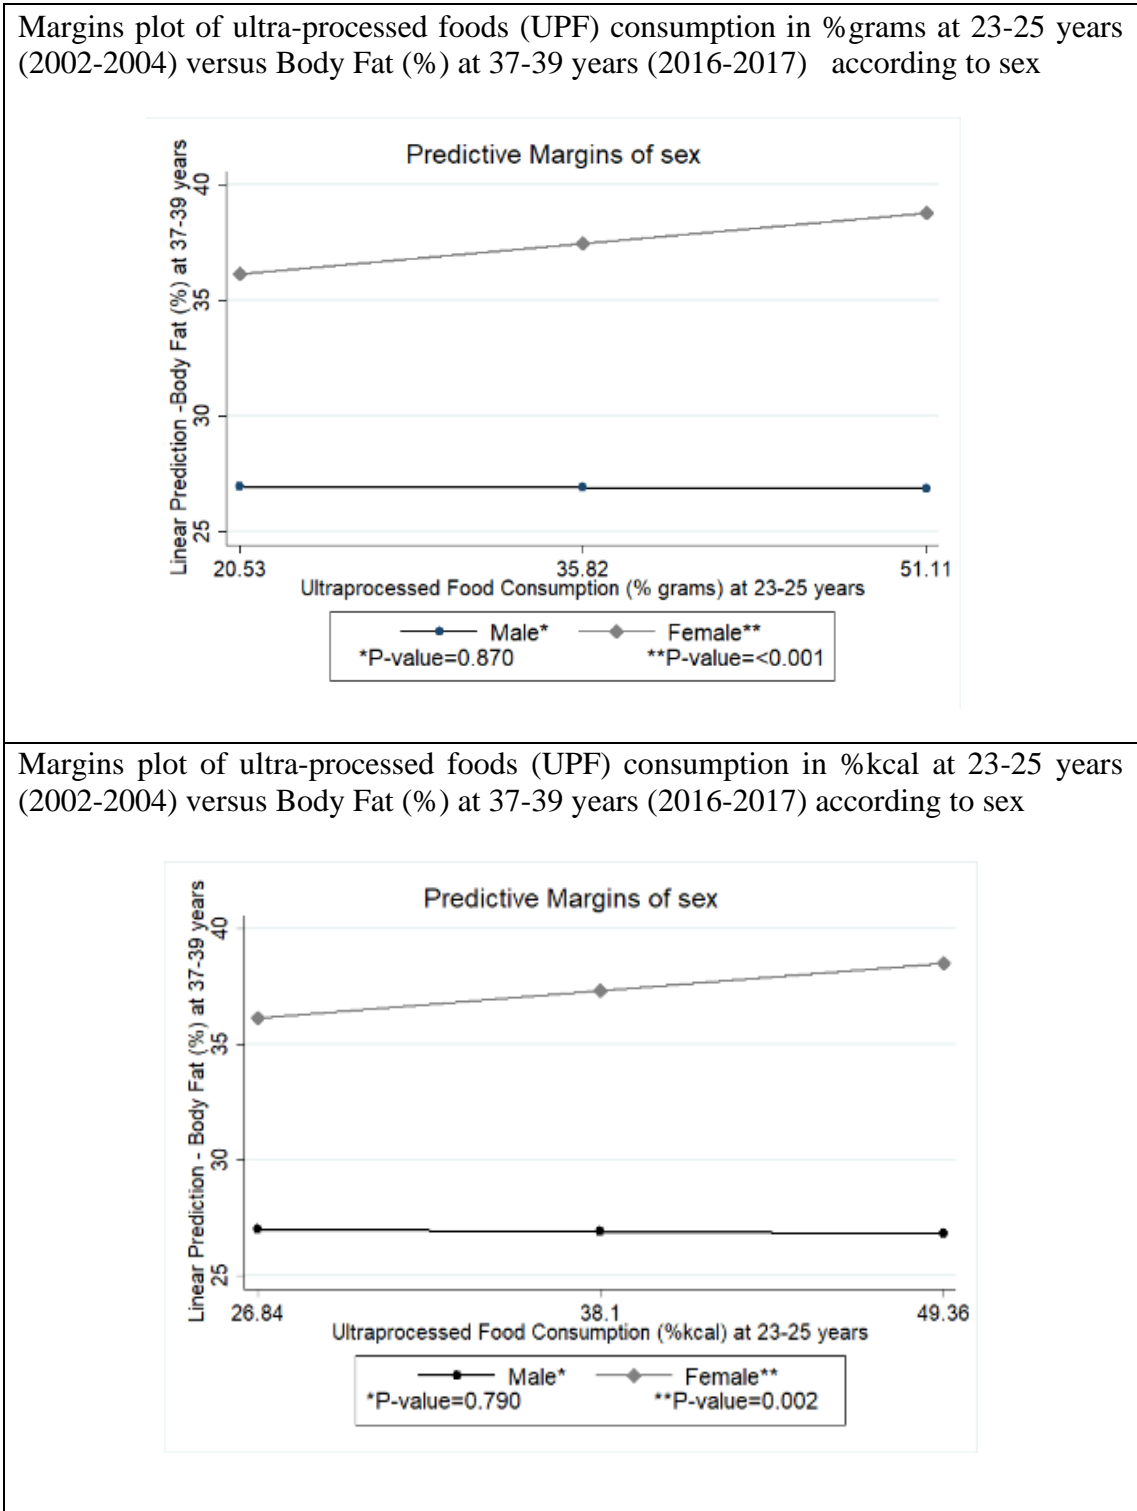

**Figure S5.** Conditional effects of ultra-processed foods (UPF) consumption at 23-25 years (2002-2004) on body composition measurements - Body Fat (%) at 37-39 years (2016-2017) according to sex. Ribeirão Preto Cohort 1978/79, São Paulo, Brazil (n=1,021)

Margins plot of ultra-processed foods (UPF) consumption in %grams at 23-25 years (2002-2004) versus Android Fat (kg) at 37-39 years (2016-2017) according to sex

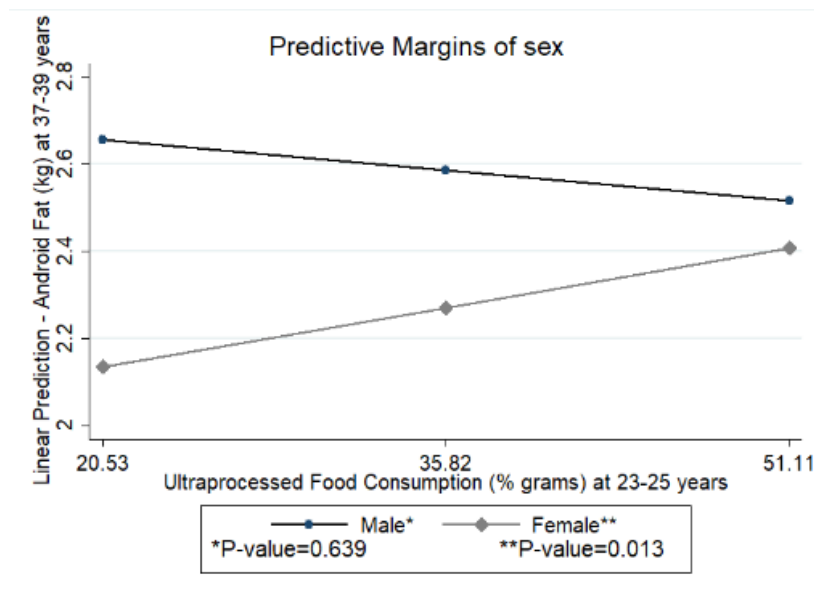

Margins plot of ultra-processed foods (UPF) consumption in %kcal at 23-25 years (2002-2004) versus Android Fat (kg) at 37-39 years (2016-2017) according to sex

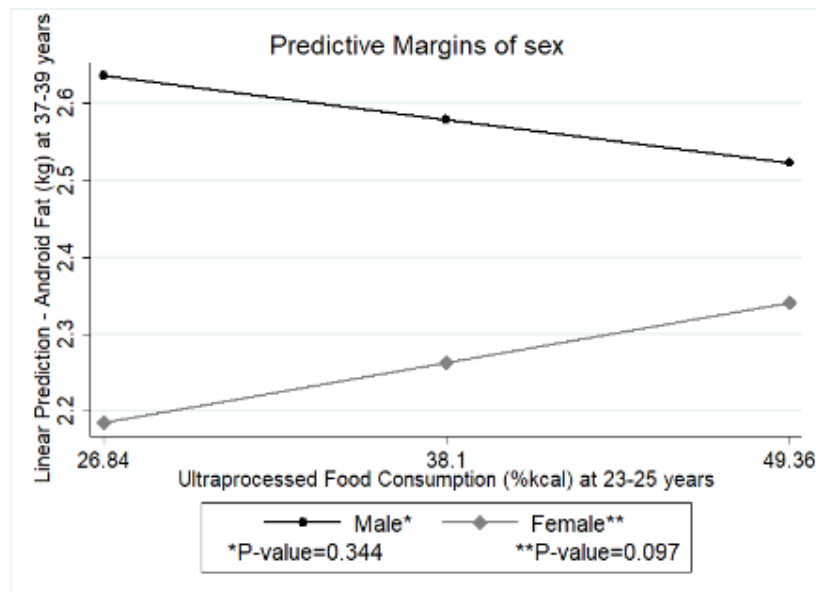

**Figure S6.** Conditional effects of ultra-processed foods (UPF) consumption at 23-25 years (2002-2004) on body composition measurements – Android Fat (kg) at 37-39 years (2016-2017) according to sex. Ribeirão Preto Cohort 1978/79, São Paulo, Brazil (n=815)

Margins plot of ultra-processed foods (UPF) consumption in %grams at 23-25 years (2002-2004) versus Gynoid Fat (kg) at 37-39 years (2016-2017) according to sex

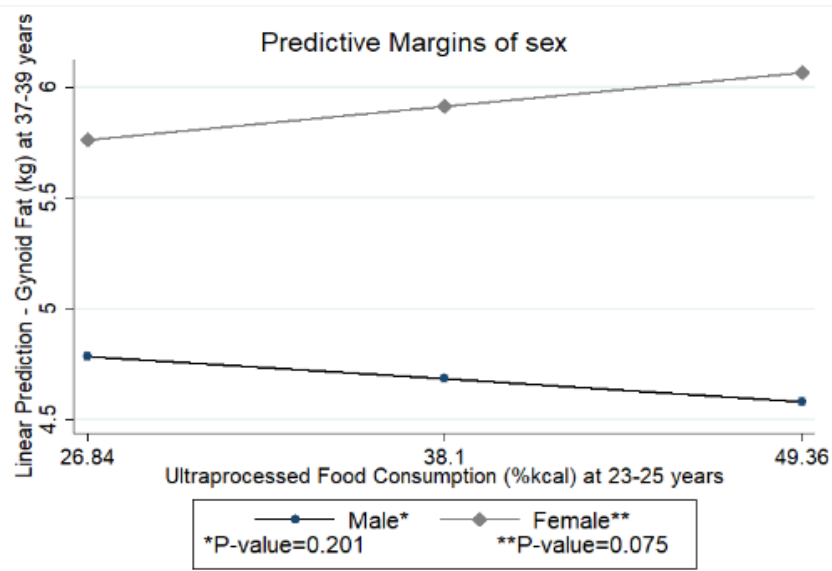

Margins plot of ultra-processed foods (UPF) consumption in %kcal at 23-25 years (2002-2004) versus Gynoid Fat (kg) at 37-39 years (2016-2017) according to sex

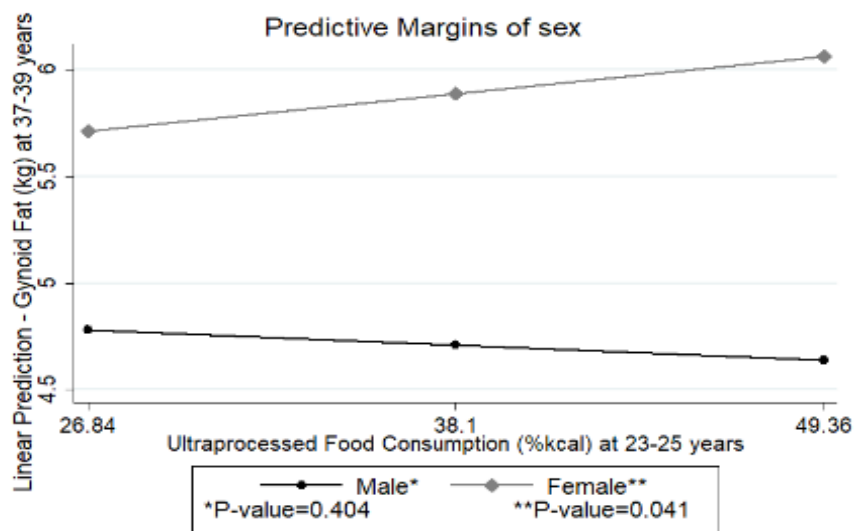

**Figure S7.** Conditional effects of ultra-processed foods (UPF) consumption at 23-25 years (2002-2004) on body composition measurements –Gynoid Fat (kg) at 37-39 years (2016-2017) according to sex. Ribeirão Preto Cohort 1978/79, São Paulo, Brazil (n=815)

Margins plot of ultra-processed foods (UPF) consumption in %grams at 23-25 years (2002-2004) versus Lean Mass (%) at 37-39 years (2016-2017) according to sex

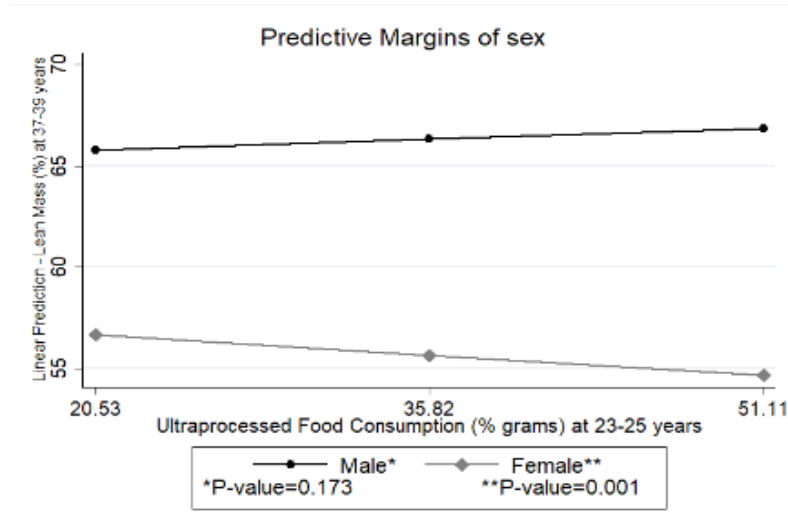

Margins plot of ultra-processed foods (UPF) consumption in %kcal at 23-25 years (2002-2004) versus Lean Mass (%) at 37-39 years (2016-2017) according to sex

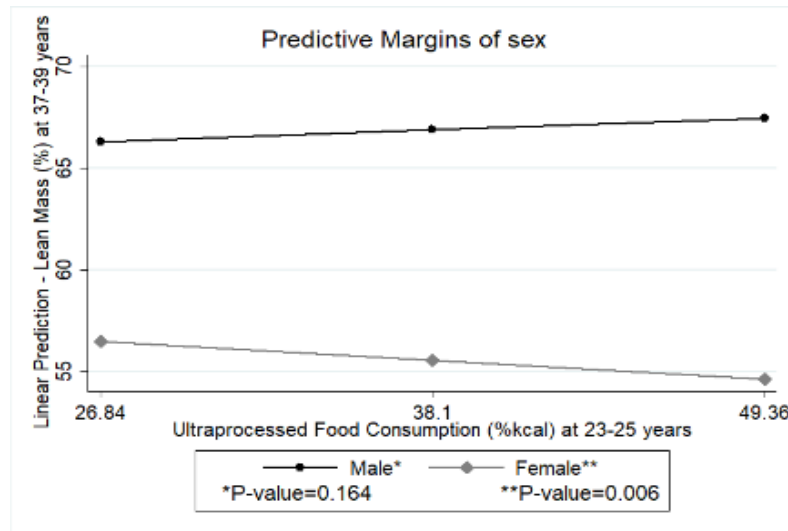

**Figure S8.** Conditional effects of ultra-processed foods (UPF) consumption at 23-25 years (2002-2004) on body composition measurements – Lean Mass (%) at 37-39 years (2016-2017) according to sex. Ribeirão Preto Cohort 1978/79, São Paulo, Brazil (n=815)
